# Supplementary material for: Comparative genome analysis of an avirulent and two virulent strains of avian Pasteurella multocida reveals candidate genes involved in fitness and pathogenicity
Source: PubMed Central journal article supplement (PMC3660278; doi:10.1186/1471-2180-13-106), 2013-05-14
Supplement: 1471-2180-13-106-S1.pdf [file 1471-2180-13-106-S1.pdf]

Supplementary Table 1. Coding regions present in *Pasteurella multocida* strain P1059 but absent from strains Pm70 and X73, excluding prophage-associated regions. Also shown is the presence of these proteins in other fully sequenced genomes.

| Gene locus | Length (aa) | Genomic island | Predicted Function                                      | Pm70 | P1059 | X73 | 36950 | HN06 | 3480 |
|------------|-------------|----------------|---------------------------------------------------------|------|-------|-----|-------|------|------|
| 00079      | 45          | 4              | Hypothetical protein                                    | -    | +     | -   | -     | -    | -    |
| 00080      | 363         | 4              | Citrate lyase ligase                                    | -    | +     | -   | -     | -    | -    |
| 00081      | 96          | 4              | Citrate lyase gamma chain                               | -    | +     | -   | -     | -    | -    |
| 00082      | 291         | 4              | Citrate lyase beta chain                                | -    | +     | -   | -     | -    | -    |
| 00083      | 503         | 4              | Citrate lyase alpha chain                               | -    | +     | -   | -     | -    | -    |
| 00084      | 482         | 4              | Triphosphoribosyl-dephosphocoenzyme-A synthase          | -    | +     | -   | -     | -    | -    |
| 00085      | 479         | 4              | Citrate carrier/transporter                             | -    | +     | -   | -     | -    | -    |
| 00086      | 90          | 4              | Hypothetical protein                                    | -    | +     | -   | +     | -    | -    |
| 00087      | 38          | 4              | Hypothetical protein                                    | -    | +     | -   | +     | -    | -    |
| 00253      | 92          | 6              | Hypothetical protein                                    | -    | +     | -   | +     | +    | -    |
| 00254      | 45          | 6              | Hypothetical protein                                    | -    | +     | -   | +     | +    | -    |
| 00255      | 39          | 6              | Hypothetical protein                                    | -    | +     | -   | -     | -    | -    |
| 00256      | 198         | 6              | Hypothetical protein                                    | -    | +     | -   | -     | -    | -    |
| 00257      | 519         | 6              | Hypothetical protein                                    | -    | +     | -   | -     | -    | -    |
| 00258      | 571         | 6              | Putative RTX toxins and related calcium binding protein | -    | +     | -   | -     | -    | -    |
| 00333      | 401         | NA             | Hypothetical protein                                    | -    | +     | -   | -     | -    | -    |
| 00517      | 69          | 8              | Hypothetical protein                                    | -    | +     | -   | -     | -    | -    |
| 00522      | 618         | 9              | Hemolysin activator protein precursor                   | -    | +     | -   | -     | +    | +    |
| 00523      | 2868        | 9              | Novel filamentous hemagglutinin PfhB4                   | -    | +     | -   | -     | +    | +    |
| 00530      | 187         | 9              | Hypothetical protein                                    | -    | +     | -   | -     | -    | -    |
| 00531      | 410         | 9              | Putative heme utilization/adhesion protein              | -    | +     | -   | -     | -    | -    |

|       |     |    |                                                            |   |   |   |   |   |   |
|-------|-----|----|------------------------------------------------------------|---|---|---|---|---|---|
| 00533 | 52  | 9  | Hypothetical protein                                       | - | + | - | - | - | - |
| 00541 | 192 | NA | Hypothetical protein                                       | - | + | - | - | - | - |
| 00586 | 154 | NA | Hypothetical protein                                       | - | + | - | - | - | - |
| 00895 | 58  | NA | Hypothetical protein                                       | - | + | - | - | - | - |
| 00901 | 53  | NA | Hypothetical protein                                       | - | + | - | - | - | - |
| 00980 | 167 | NA | RcpB protein                                               | - | + | - | - | + | - |
| 01229 | 71  | 20 | Mobilization protein A, truncated protein                  | - | + | - | - | - | - |
| 01230 | 298 | 20 | Cobalt-zinc-cadmium resistant protein                      | - | + | - | - | - | - |
| 01231 | 110 | 20 | Plem2 protein                                              | - | + | - | - | - | - |
| 01232 | 61  | 20 | Hypothetical protein                                       | - | + | - | - | - | - |
| 01235 | 575 | 22 | Hypothetical protein                                       | - | + | - | - | - | - |
| 01276 | 331 | 24 | YadA -terminal domain protein                              | - | + | - | - | - | - |
| 01350 | 154 | NA | Hypothetical protein                                       | - | + | - | - | - | - |
| 01354 | 217 | 27 | Hypothetical protein                                       | - | + | - | - | - | - |
| 01355 | 214 | 27 | Hypothetical protein                                       | - | + | - | - | - | - |
| 01462 | 84  | NA | Hypothetical protein                                       | - | + | - | - | - | - |
| 01463 | 204 | NA | Hypothetical protein                                       | - | + | - | - | - | - |
| 01535 | 440 | 30 | Xylose isomerase                                           | - | + | - | + | + | - |
| 01536 | 396 | 30 | Aspartate aminotransferase                                 | - | + | - | + | + | + |
| 01537 | 467 | 30 | Na <sup>+</sup> /H <sup>+</sup> antiporter NhaC            | - | + | - | + | + | + |
| 01538 | 332 | 30 | Xylose ABC transporter, periplasmic xylose-binding protein | - | + | - | + | + | + |
| 01539 | 504 | 30 | Xylose transport ATP-binding protein                       | - | + | - | + | + | + |
| 01540 | 375 | 30 | Ribose ABC transport system, permease protein              | - | + | - | + | + | + |
| 01541 | 389 | 30 | Xylose activator XylR (AraC family)                        | - | + | - | + | + | + |
| 01905 | 55  | NA | Hypothetical protein                                       | - | + | - | + | - | - |
| 01942 | 126 | NA | Hypothetical protein                                       | - | + | - | - | - | - |

|       |      |    |                              |   |   |   |   |   |   |
|-------|------|----|------------------------------|---|---|---|---|---|---|
| 01943 | 188  | NA | Hypothetical protein         | - | + | - | - | - | - |
| 01948 | 40   | NA | Hypothetical protein         | - | + | - | - | - | - |
| 01949 | 138  | NA | Hypothetical protein         | - | + | - | - | - | - |
| 02005 | 435  | 38 | Putative HipA-like toxin     | - | + | - | + | - | - |
| 02006 | 111  | 38 | Putative HipB-like antitoxin | - | + | - | + | - | - |
| 02011 | 1681 | 39 | Putative helicase            | - | + | - | - | - | - |
