# Supplementary material for: Comparative genome analysis of an avirulent and two virulent strains of avian Pasteurella multocida reveals candidate genes involved in fitness and pathogenicity
Source: PubMed Central journal article supplement (PMC3660278; doi:10.1186/1471-2180-13-106), 2013-05-14
Supplement: 1471-2180-13-106-S2.pdf [file 1471-2180-13-106-S2.pdf]

Supplementary Table 2. Coding regions present in *Pasteurella multocida* strain X73 but absent from strains Pm70 and P1059, excluding prophage-associated regions. Also shown is protein presence in other sequenced genomes.

| Gene locus | Length (aa) | Genomic island | Predicted Function                                              | Pm70 | P1059 | X73 | 36950 | HN06 | 3480 |
|------------|-------------|----------------|-----------------------------------------------------------------|------|-------|-----|-------|------|------|
| 00113      | 317         | 5              | Hypothetical protein                                            | -    | -     | +   | -     | -    | -    |
| 00177      | 51          | NA             | Hypothetical protein                                            | -    | -     | +   | -     | -    | -    |
| 00310      | 317         | 7              | Tagatose 1,6-bisphosphate aldolase                              | -    | -     | +   | -     | -    | -    |
| 00311      | 430         | 7              | Tagatose-6-phosphate kinase                                     | -    | -     | +   | -     | -    | -    |
| 00312      | 151         | 7              | PTS <sup>A</sup> system, galactitol-specific IIA component      | -    | -     | +   | -     | -    | -    |
| 00313      | 94          | 7              | PTS system, galactitol-specific IIB component                   | -    | -     | +   | -     | -    | -    |
| 00314      | 451         | 7              | PTS system, galactitol-specific IIC component                   | -    | -     | +   | -     | -    | -    |
| 00315      | 347         | 7              | Galactitol-1-phosphate 5-dehydrogenase                          | -    | -     | +   | -     | -    | -    |
| 00316      | 252         | 7              | Galactitol utilization operon repressor                         | -    | -     | +   | -     | -    | -    |
| 00317      | 129         | 7              | Hypothetical protein                                            | -    | -     | +   | -     | -    | -    |
| 00318      | 73          | 7              | Hypothetical protein                                            | -    | -     | +   | -     | -    | -    |
| 00319      | 56          | 7              | Hypothetical protein                                            | -    | -     | +   | -     | -    | -    |
| 00320      | 271         | 7              | Glycosyltransferase                                             | -    | -     | +   | -     | -    | -    |
| 00321      | 68          | 7              | Glycosyltransferase                                             | -    | -     | +   | -     | -    | -    |
| 00322      | 204         | 7              | Hypothetical protein                                            | -    | -     | +   | -     | -    | -    |
| 00323      | 364         | 7              | UDP-glucose dehydrogenase                                       | -    | -     | +   | -     | -    | -    |
| 00518      | 82          | 10             | Hypothetical protein                                            | -    | -     | +   | -     | +    | +    |
| 00519      | 53          | 10             | Hypothetical protein                                            | -    | -     | +   | -     | +    | +    |
| 00773      | 133         | NA             | Protein containing domains from glyoxalase/bleomycin resistance | -    | -     | +   | -     | -    | -    |
| 00812      | 333         | 16             | Transcriptional regulator –LacI family                          | -    | -     | +   | +     | -    | -    |
| 00813      | 339         | 16             | L-idonate 5-dehydrogenase protein                               | -    | -     | +   | +     | -    | -    |

|       |     |    |                                                                     |   |   |   |   |   |   |
|-------|-----|----|---------------------------------------------------------------------|---|---|---|---|---|---|
| 00814 | 255 | 16 | 5-keto-D-gluconate 5-reductase protein                              | - | - | + | + | - | - |
| 00815 | 337 | 16 | TRAP <sup>B</sup> dicarboxylate transporter protein                 | - | - | + | + | - | - |
| 00816 | 441 | 16 | Putative gluconate TRAP family transportor protein                  | - | - | + | + | - | - |
| 00838 | 526 | 17 | Hypothetical protein                                                | - | - | + | - | - | - |
| 00950 | 148 | 19 | Ribose-5-phosphate isomerase B                                      | - | - | + | - | - | - |
| 00951 | 299 | 19 | D-allose kinase protein                                             | - | - | + | - | - | - |
| 00952 | 222 | 19 | D-allulose-6-phosphate3-epimerase                                   | - | - | + | - | - | - |
| 00953 | 315 | 19 | D-allose ABC transporter permease component                         | - | - | + | - | - | - |
| 00954 | 507 | 19 | D-allose ABC transporter, ATPase component                          | - | - | + | - | - | - |
| 00955 | 312 | 19 | D-allose ABC transporter, substrate-binding component               | - | - | + | - | - | - |
| 00956 | 284 | 19 | Transcriptional regulator of D-allose utilization –RpiR family      | - | - | + | - | - | - |
| 01120 | 46  | NA | Hypothetical protein                                                | - | - | + | - | - | - |
| 01128 | 263 | 21 | Hypothetical protein                                                | - | - | + | - | - | - |
| 01164 | 63  | 23 | Hypothetical protein                                                | - | - | + | - | - | - |
| 01165 | 63  | 23 | Hypothetical protein                                                | - | - | + | - | - | - |
| 01180 | 252 | 25 | Hypothetical protein                                                | - | - | + | - | - | - |
| 01181 | 293 | 25 | Choline kinase                                                      | - | - | + | - | - | - |
| 01182 | 302 | 25 | Choline permease                                                    | - | - | + | - | - | - |
| 01183 | 230 | 25 | Cholinephosphate cytidyltransferase                                 | - | - | + | - | - | - |
| 01439 | 394 | 29 | Mannonate dehydratase                                               | - | - | + | + | - | + |
| 01440 | 248 | 29 | Hexuronate utilization operon transcriptional repressor xUR protein | - | - | + | + | - | + |
| 01441 | 324 | 29 | TRAP-type4-dicarboxylate transport system, periplasmic component    | - | - | + | + | - | + |
| 01442 | 162 | 29 | TRAP-type transport system,small permease component                 | - | - | + | + | - | + |

|       |     |    |                                                                                 |   |   |   |   |   |   |
|-------|-----|----|---------------------------------------------------------------------------------|---|---|---|---|---|---|
| 01443 | 436 | 29 | TRAP-type4-dicarboxylate transport system, large permease component             | - | - | + | + | - | + |
| 01444 | 281 | 29 | D-mannonate oxidoreductase                                                      | - | - | + | + | - | + |
| 01445 | 467 | 29 | Uronate isomerase                                                               | - | - | + | + | - | + |
| 01446 | 313 | 29 | 2-dehydro-3-deoxygluconate kinase                                               | - | - | + | + | - | + |
| 01484 | 285 | 32 | Arabinose operon regulatory protein                                             | - | - | + | - | - | - |
| 01485 | 324 | 32 | Sugar-binding protein                                                           | - | - | + | - | - | - |
| 01486 | 496 | 32 | ABC-type sugar transport system, ATP-binding protein                            | - | - | + | - | - | - |
| 01487 | 319 | 32 | Ribose ABC transport system, permease protein RbsC                              | - | - | + | - | - | - |
| 01488 | 315 | 32 | Ribose/xylose/arabinose/galactoside ABC-type transport system, permease protein | - | - | + | - | - | - |
| 01489 | 499 | 32 | Ribulokinase                                                                    | - | - | + | - | - | - |
| 01490 | 495 | 32 | L-arabinose isomerase                                                           | - | - | + | - | - | - |
| 01607 | 41  | NA | Hypothetical protein                                                            | - | - | + | - | - | - |
| 01628 | 461 | 34 | Type I restriction-modification protein                                         | - | - | + | - | - | - |
| 01629 | 396 | 34 | Hypothetical protein                                                            | - | - | + | - | - | - |
| 01693 | 263 | NA | Sodium channel protein                                                          | - | - | + | - | - | - |
| 01824 | 647 | 36 | Putative phosphatase protein                                                    | - | - | + | - | - | - |
| 01856 | 378 | 37 | Hypothetical protein                                                            | - | - | + | - | - | - |
| 01858 | 139 | 37 | Hypothetical protein                                                            | - | - | + | - | - | - |
| 01859 | 539 | 37 | Hypothetical protein                                                            | - | - | + | - | - | - |
| 01860 | 273 | 37 | DNA methyltransferase protein                                                   | - | - | + | - | - | - |

<sup>A</sup>PTS = Phosphoenolpyruvate-dependent carbohydrate transport system. <sup>B</sup>TRAP = Tripartite ATP-independent periplasmic transport
